# Supplementary material for: Unveiling the Chemical Diversity of the Deep-Sea Sponge Characella pachastrelloides
Source: MDPI journal article supplement (doi:10.3390/md20010052), 2022-01-05
Supplement: s1 [file s1]

## Supplementary information

# Unveiling the chemical diversity of the deep-sea sponge *Characella pachastrelloides*

Sam Afoullouss <sup>1,2</sup>, Anthony R. Sanchez <sup>3</sup>, Laurence K. Jennings<sup>1</sup>, Younghoon Kee<sup>3</sup>, A. Louise Allcock<sup>2</sup>, and Olivier P. Thomas <sup>1,\*</sup>

<sup>1</sup> Marine Biodiscovery, School of Chemistry and Ryan Institute, National University of Ireland Galway (NUI Galway), University Road, H91TK33 Galway, Ireland

<sup>2</sup> School of Natural Sciences and Ryan Institute, National University of Ireland Galway (NUI Galway), University Road, H91TK33 Galway, Ireland

<sup>3</sup> Department of Cell Biology, Microbiology, and Molecular Biology, University of South Florida, 4202 E.Fowler Ave., ISA2015, Tampa, FL 33620, USA; anthony.sanchez@austin.utexas.edu (A.R.S.); ykee@dgist.ac.kr (Y.K.)

Table S1: Conditions and parameters used from HRESIMS analysis on *Characella pachastrelloides* using a UPLC-Q-ToF system for DDA LC-MSMS analysis.....3

Figure S1: Feature based molecular network with a zoom in on characellide cluster. Two known compounds characellide A (**1**) and characellide C(**3**) were annotated in the network. Characellides 854 and 868 are predicated to be present by examination of changes in fragments masses. MS/MS spectra of the characellides are displayed highlighting the key fragments. Fragmentation patterns of the characellides show the structures of the corresponding fragments..... 4

Figure S2: <sup>1</sup>H-NMR spectra of mixture containing poecillastrin H (**5**) in CD<sub>3</sub>OD (500 MHz) ..... 5

Figure S3 : UPLC-UV (370 nm) chromatogram of the subfraction SA-1826-F3-P6 containing poecillastrin E & H (**5,6**). ..... 5

Figure S4: HRESIMS spectra of poecillastrin H (**5**). ..... 6

Figure S5: HRESIMS spectra of poecillastrin E (**6**). ..... 6

Figure S6: <sup>1</sup>H-NMR spectra of cyanocobalamin standard (top) and isolated cyanocobalamin (**7**) (bottom) in CD<sub>3</sub>OD (600 MHz). ..... 7

Figure S7: HSQC spectra of cyanocobalamin standard (top) and isolated cyanocobalamin (**7**) (bottom) in CD<sub>3</sub>OD (600 MHz). ..... 8

Figure S8: HRESIMS spectra of cyanocobalamin (**7**). ..... 8

Figure S9: <sup>1</sup>H-NMR spectra of 6-methyl hercynine (**8**) in D<sub>2</sub>O (500 MHz). ..... 9

Figure S10: <sup>1</sup>H-<sup>1</sup>H COSY NMR spectra of 6-methyl hercynine (**8**) in D<sub>2</sub>O (500 MHz). ..... 9

Figure S11: <sup>13</sup>C NMR spectra of 6-methyl hercynine (**8**) in D<sub>2</sub>O (125 MHz). ..... 10

Figure S12: <sup>1</sup>H-<sup>13</sup>C HSQC NMR spectra of 6-methyl hercynine (**8**) in D<sub>2</sub>O (500 MHz). ..... 10

Figure S13: HMBC NMR spectra of 6-methyl hercynine (**8**) in D<sub>2</sub>O (500 MHz). ..... 11

Figure S14: HRESIMS spectra of 6-methyl hercynine (**8**). ..... 11

Figure S15: Experimental (solid black) and calculated ECD spectra of compound (**8**) for enantiomer 2S (dashed red) and 2R (dashed blue); and zwitterion (left), monocharged (centre), and double charged (right). ..... 11

Figure S16: Experimental (solid black) and calculated UV spectra of compound (**8**) for enantiomer 2S (dashed red) and 2R (dashed blue); and zwitterion (left), monocharged (centre), and double charged (right). ..... 12

Figure S17: HeLa cells were treated with 6-methylmercynine (red) or DMSO (black) at the indicated concentrations for 10 days. Cell survival was measured by crystal violet staining. Error bars represent 95% confidence interval from 3 biological replicate: ..... 12

| Parameter                      | Condition |
|--------------------------------|-----------|
| Sample Concentration           | 2 mg/ mL  |
| Liquid Chromatography Duration | 18 min    |
| Collision Energy               | 30 eV     |
| Precursor Per Cycle            | 3         |
| Gas Temperature                | 300 °C    |
| Nebuliser Pressure             | 30 PSI    |
| Sheath Gas Temperature         | 310 °C    |
| Capillary Voltage              | 3000 V    |
| Nozzle Voltage                 | 750 V     |
| Fragmentor Voltage             | 140 V     |
| Skimmer Voltage                | 55 V      |

Table S1: Conditions and parameters used from HRESIMS analysis on *Characella pachastrelloides* using a UPLC-Q-ToF system for DDA LC-MSMS analysis.

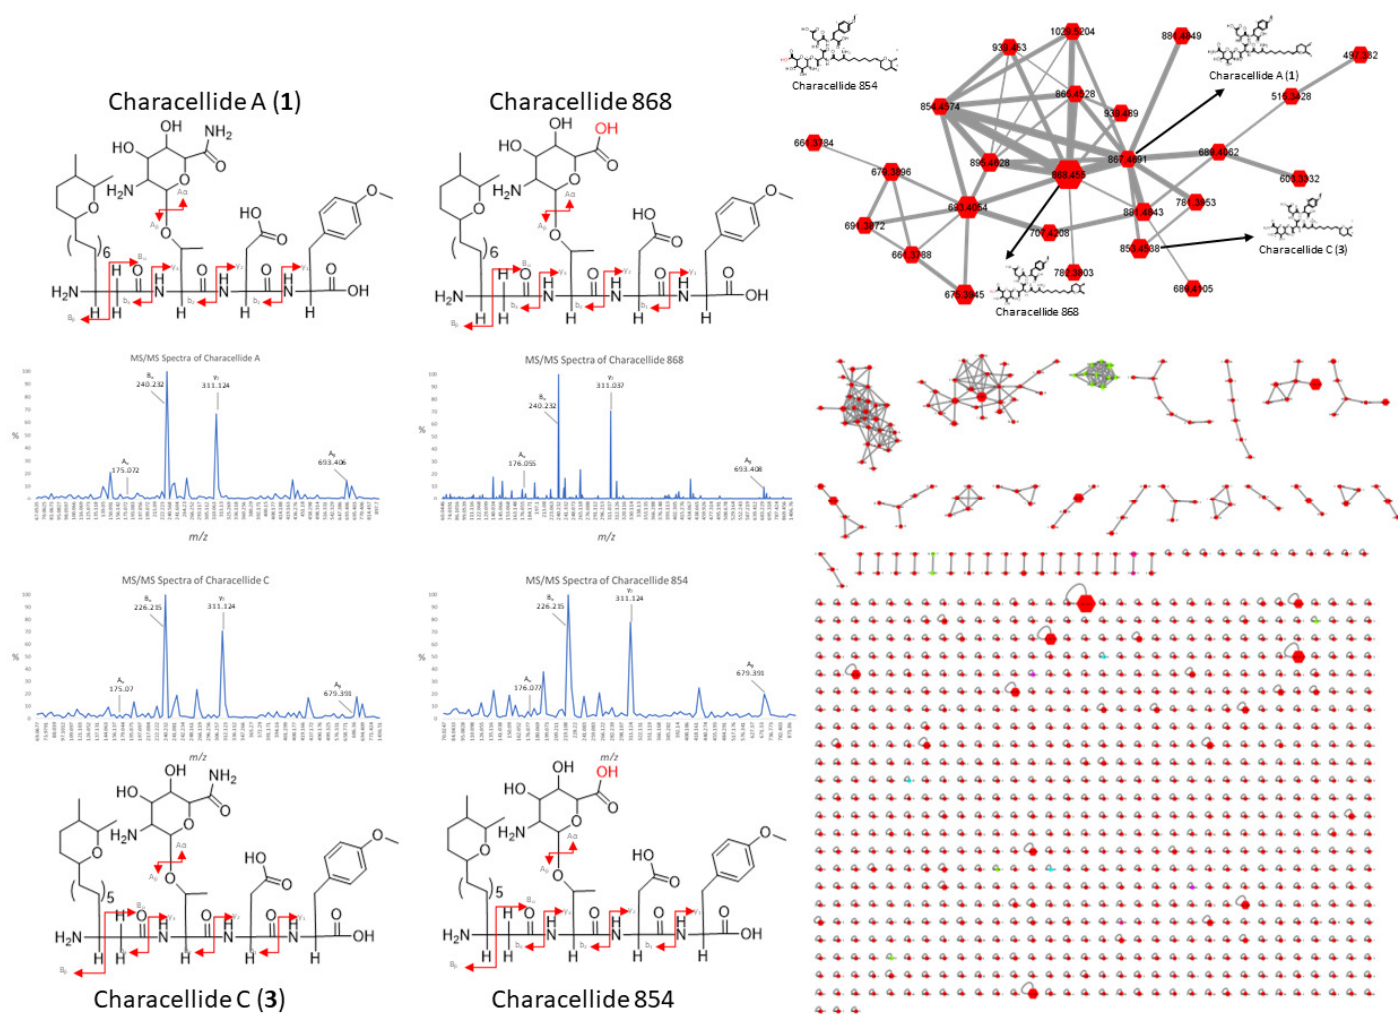

Figure S1: Feature based molecular network with a zoom in on characellide cluster. Two known compounds characellide A (1) and characellide C(3) were annotated in the network. Characellides 854 and 868 are predicted to be present by examination of changes in fragments masses. MS/MS spectra of the characellides are displayed highlighting the key fragments. Fragmentation patterns of the characellides show the structures of the corresponding fragments.

## Poecillastrins 5 and 6

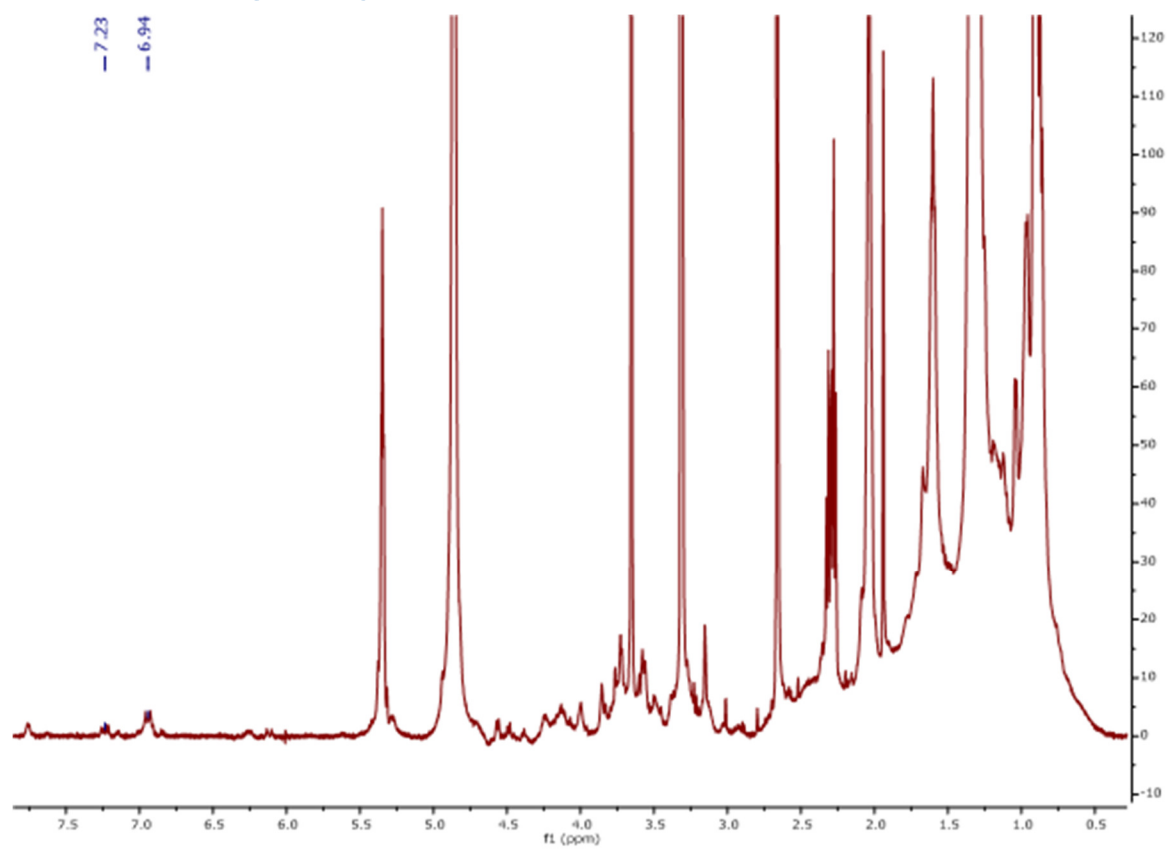

Figure S2: 1H-NMR spectra of mixture containing poecillastrin H (5) in CD<sub>3</sub>OD (500 MHz)

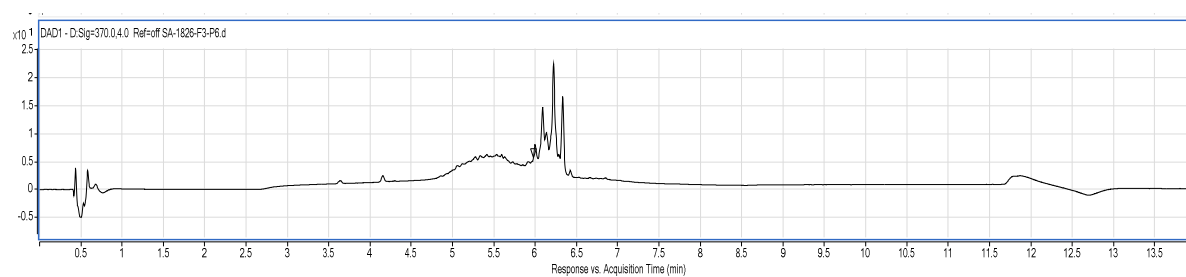

Figure S3 : UPLC-UV (370 nm) chromatogram of the subfraction SA-1826-F3-P6 containing poecillastrin E & H (5,6).

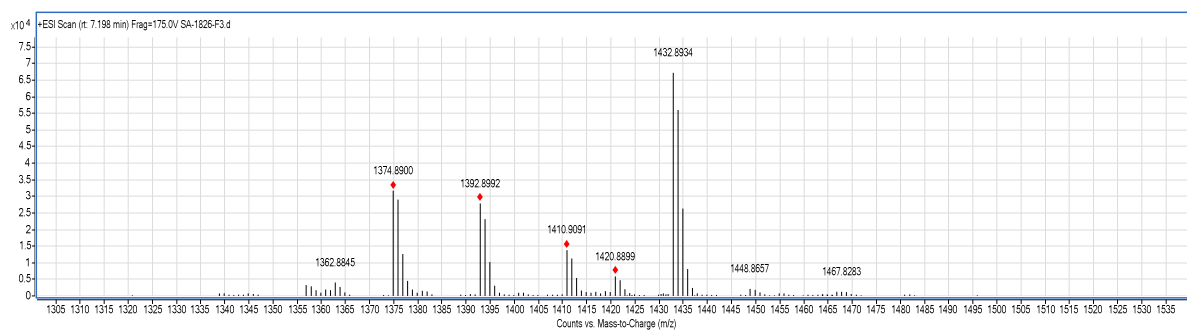

Figure S4: HRESIMS spectra of poecillastrin H (5).

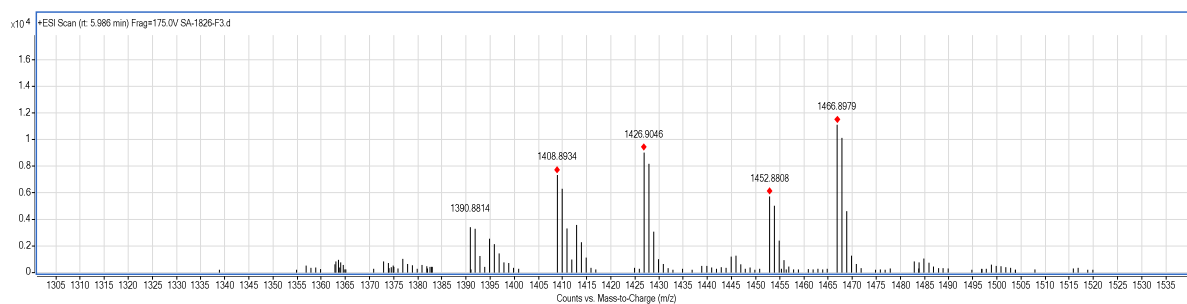

Figure S5: HRESIMS spectra of poecillastrin E (6).

## Cyanocobalamin (7)

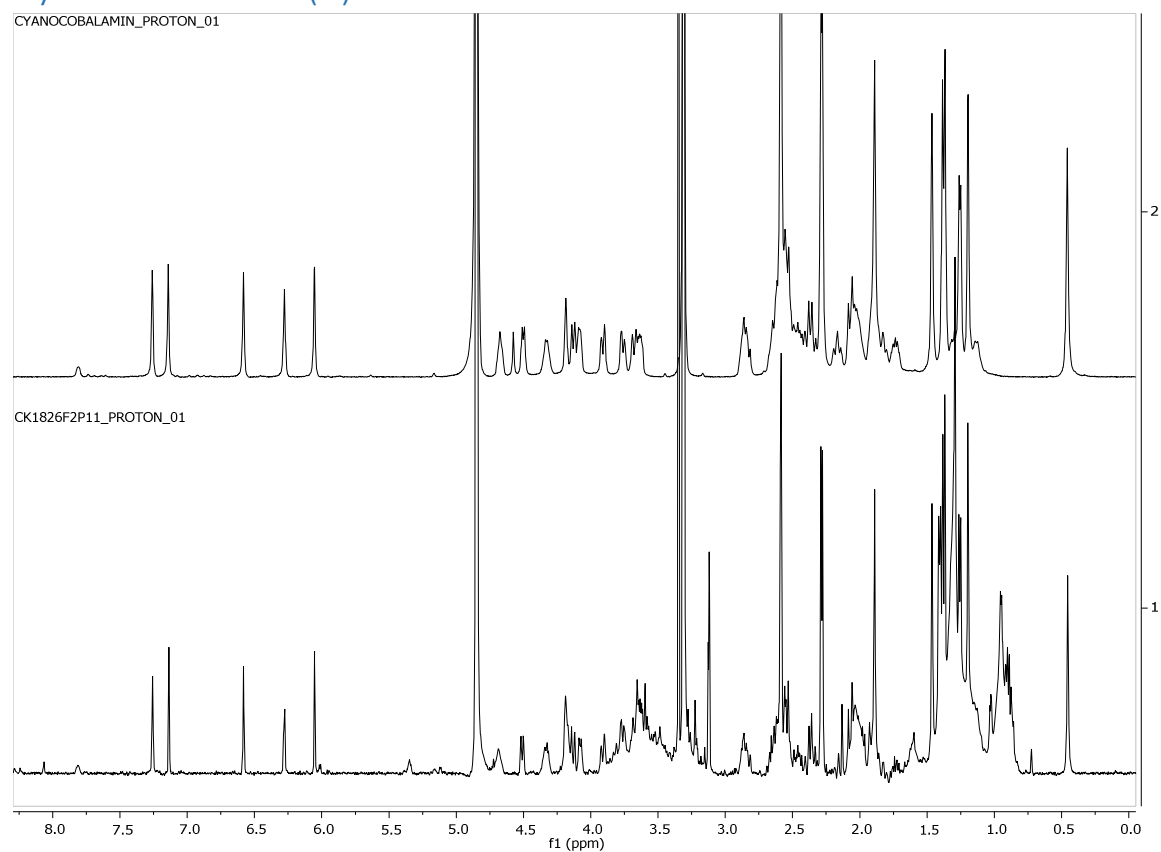

Figure S6:  $^1\text{H}$ -NMR spectra of cyanocobalamin standard (top) and isolated cyanocobalamin (**7**) (bottom) in  $\text{CD}_3\text{OD}$  (600 MHz).

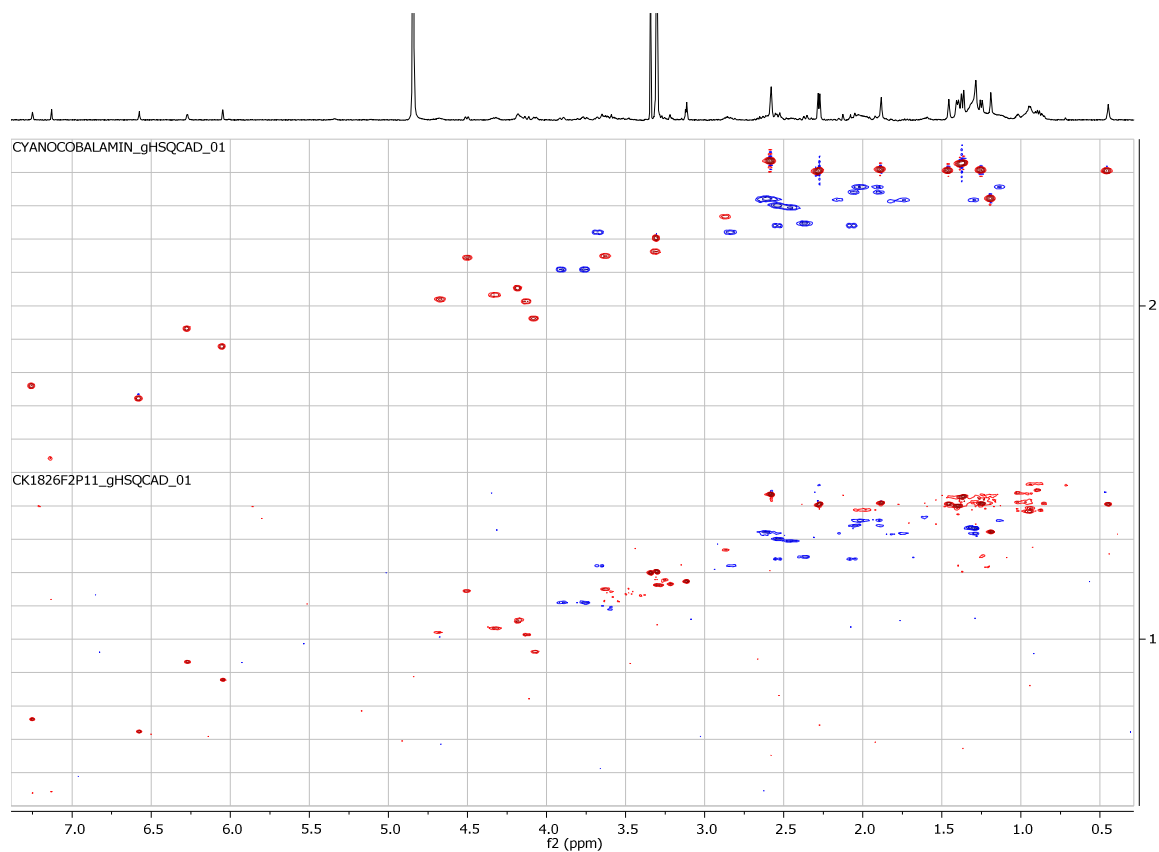

Figure S7: HSQC spectra of cyanocobalamin standard (top) and isolated cyanocobalamin (**7**) (bottom) in CD<sub>3</sub>OD (600 MHz).

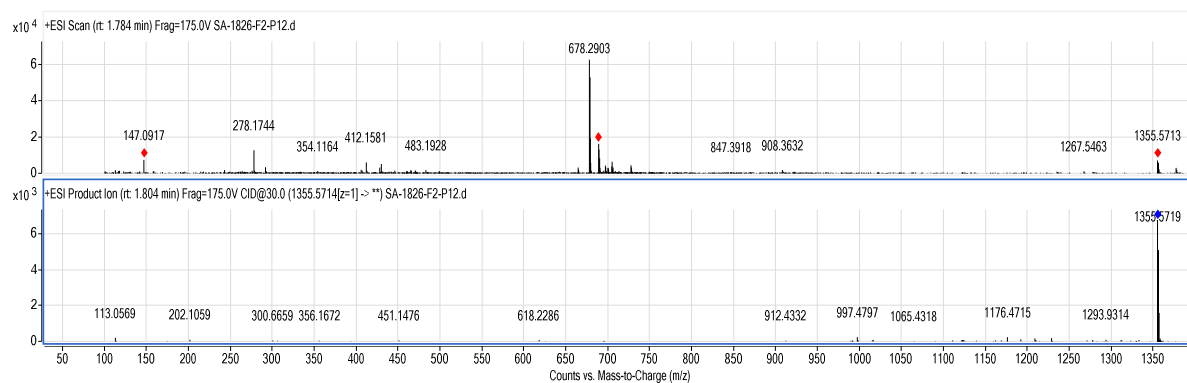

Figure S8: HRESIMS spectra of cyanocobalamin (**7**).



## Betaine: 6-methylhercynine (8)

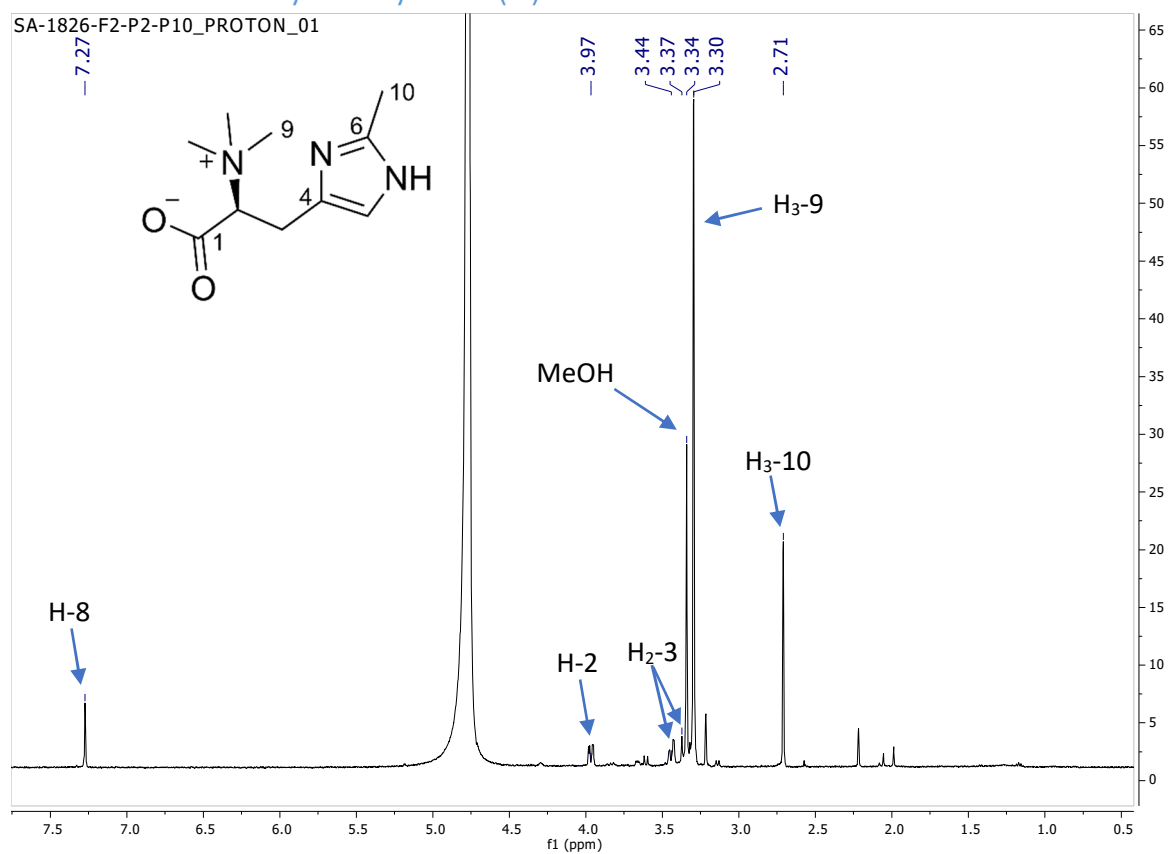

Figure S9:  $^1\text{H}$ -NMR spectra of 6-methyl hercynine (**8**) in  $\text{D}_2\text{O}$  (500 MHz).

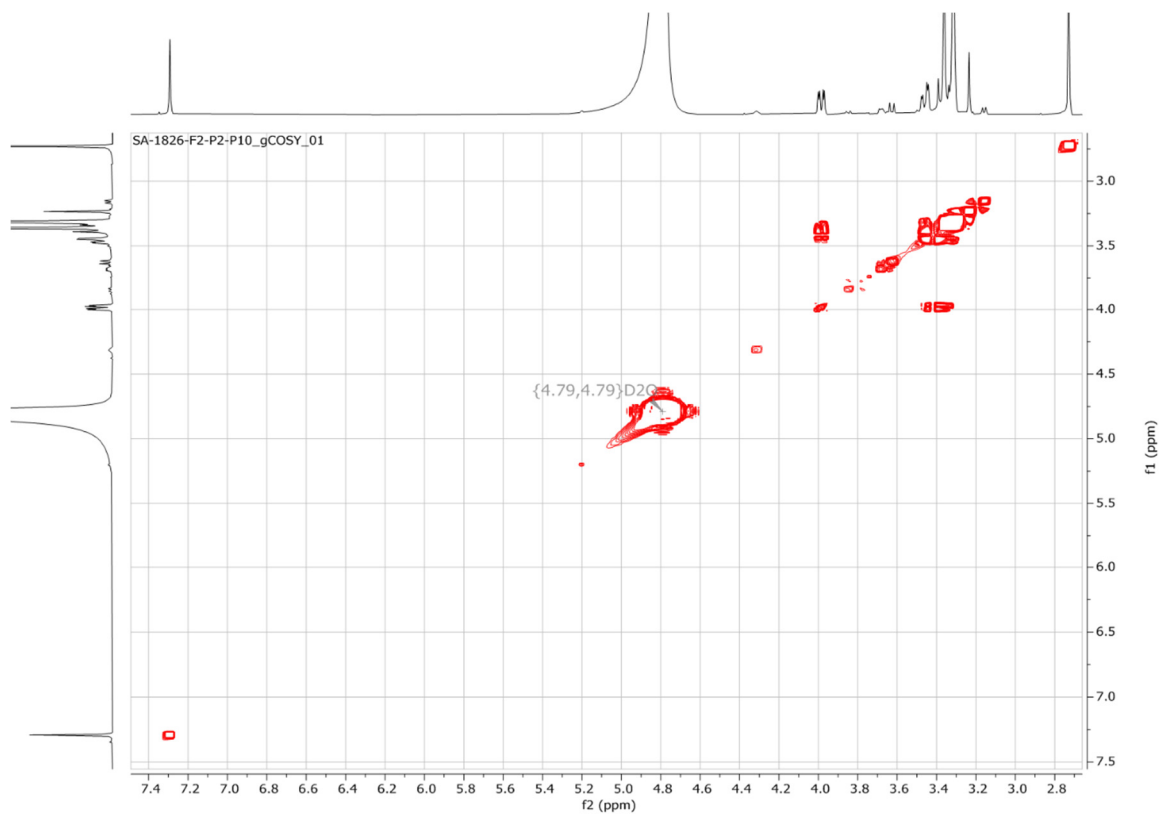

Figure S10:  $^1\text{H}$ - $^1\text{H}$  COSY NMR spectra of 6-methyl hercynine (**8**) in  $\text{D}_2\text{O}$  (500 MHz).

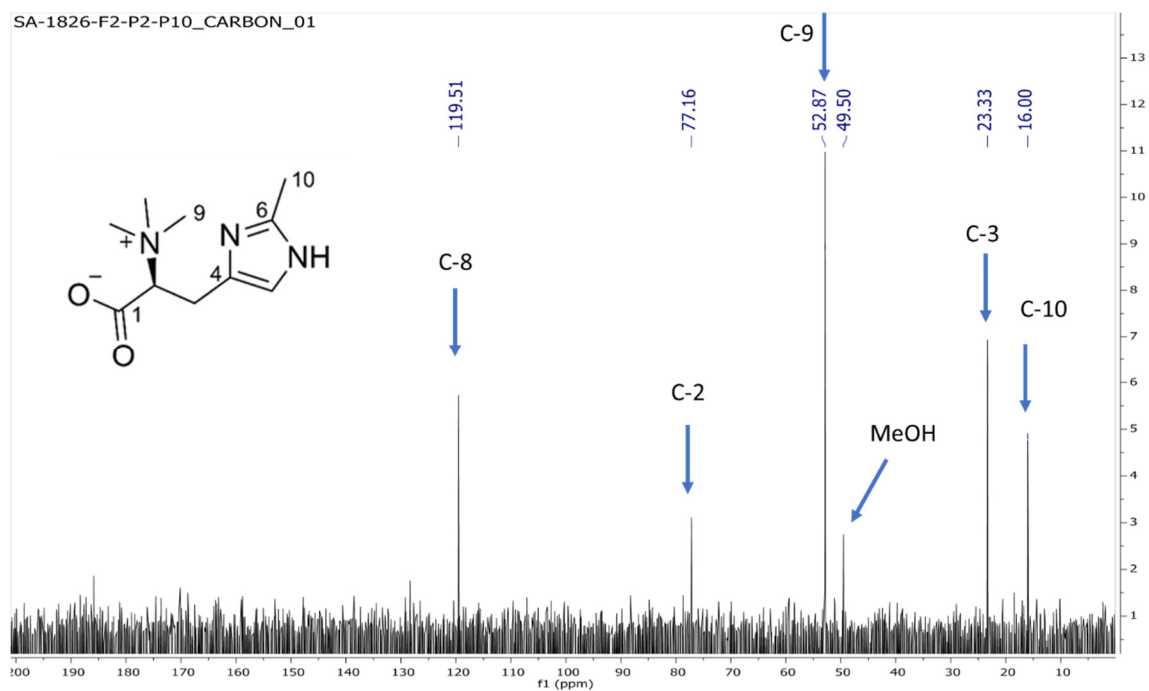

Figure S11:  $^{13}\text{C}$  NMR spectra of 6-methyl hercynine (**8**) in  $\text{D}_2\text{O}$  (125 MHz).

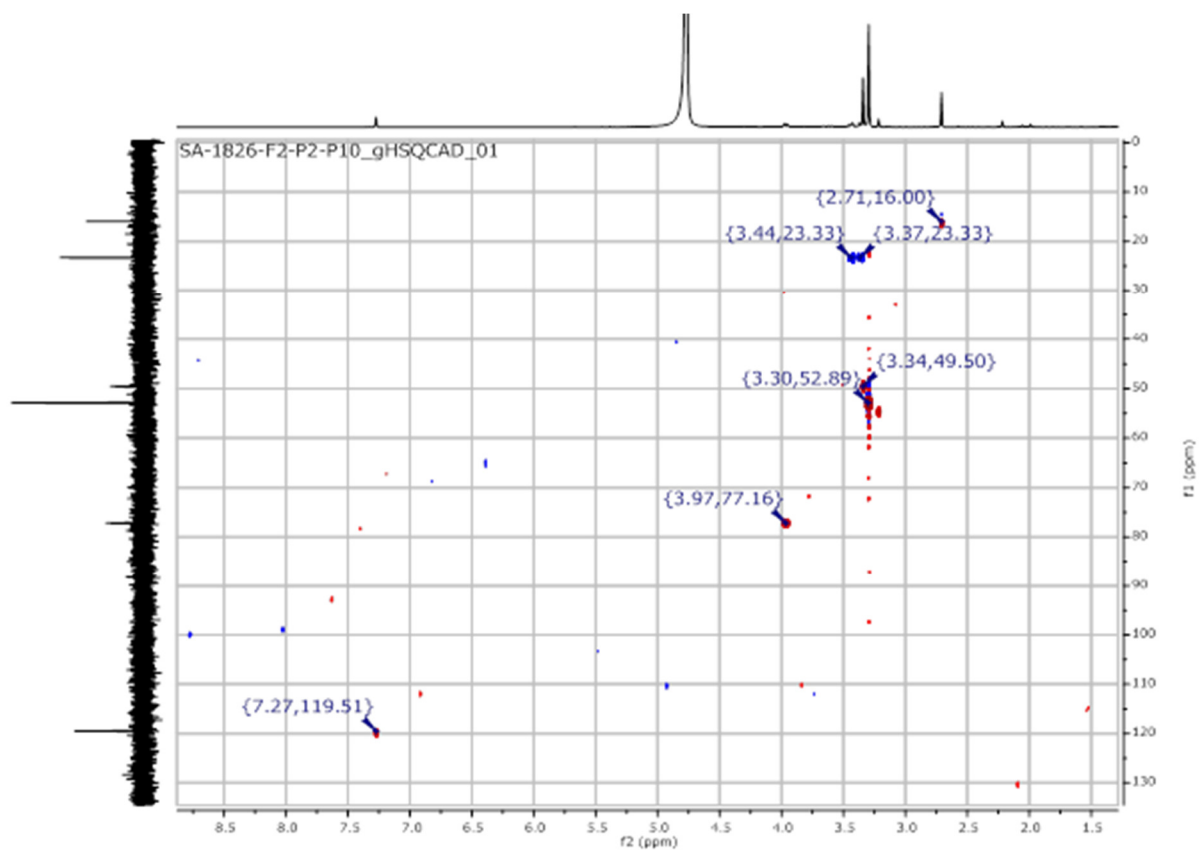

Figure S12:  $^1\text{H}$ - $^{13}\text{C}$  HSQC NMR spectra of 6-methyl hercynine (**8**) in  $\text{D}_2\text{O}$  (500 MHz).

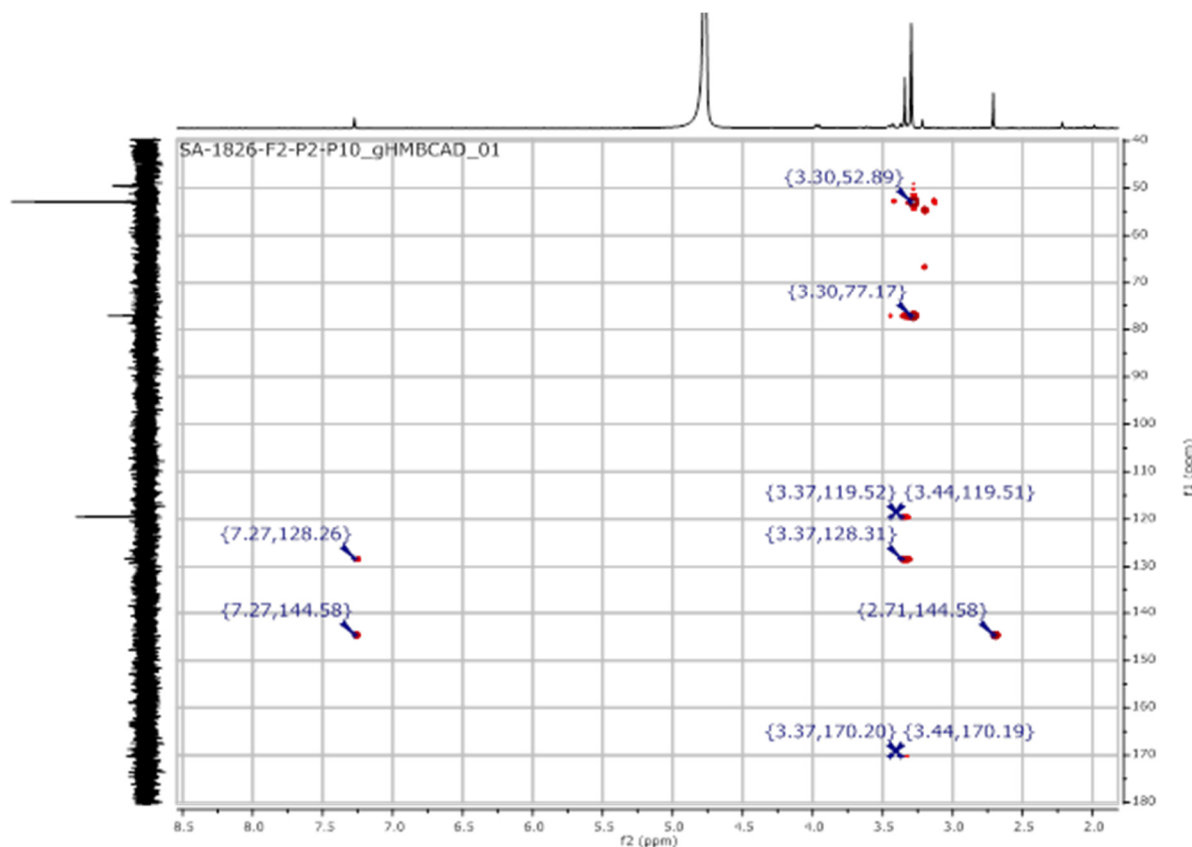

Figure S13: HMBC NMR spectra of 6-methyl hercynine (**8**) in D<sub>2</sub>O (500 MHz).

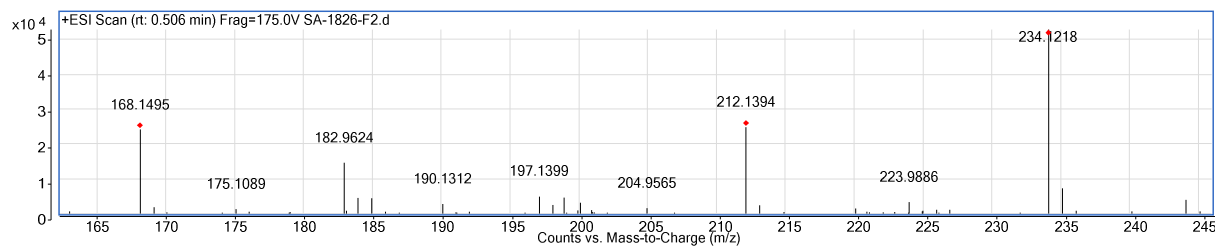

Figure S14: HRESIMS spectra of 6-methyl hercynine (**8**).

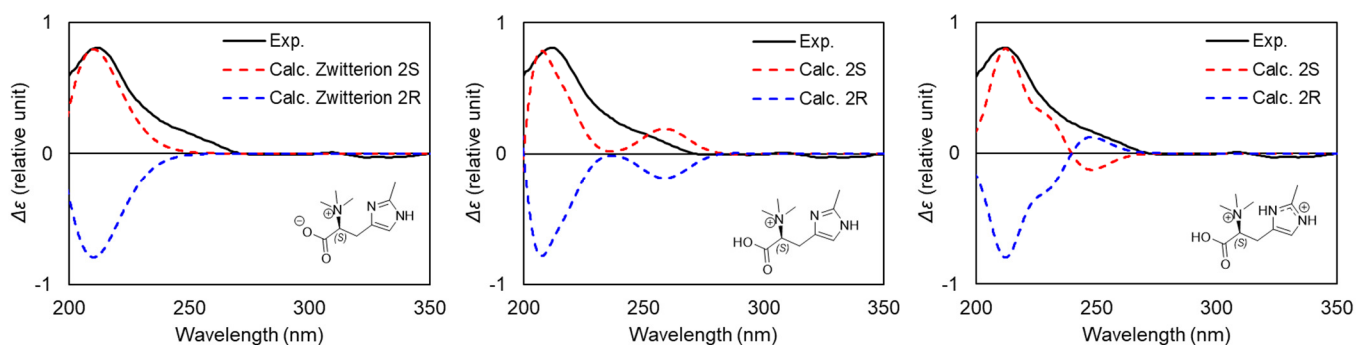

Figure S15: Experimental (solid black) and calculated ECD spectra of compound (**8**) for enantiomer 2S (dashed red) and 2R (dashed blue); and zwitterion (left), monocharged (centre), and double charged (right).

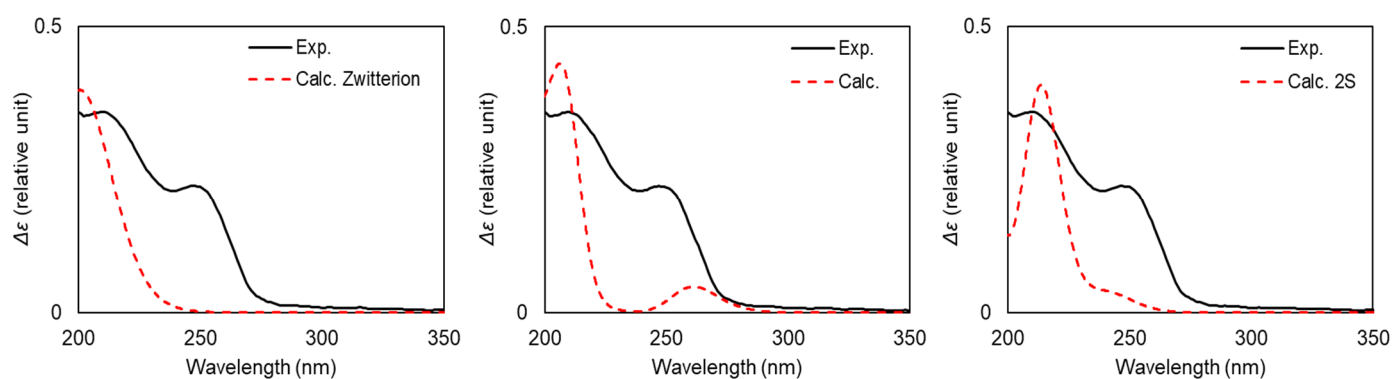

Figure S16: Experimental (solid black) and calculated UV spectra of compound (8) for enantiomer 2S (dashed red) and 2R (dashed blue); and zwitterion (left), monocharged (centre), and double charged (right).

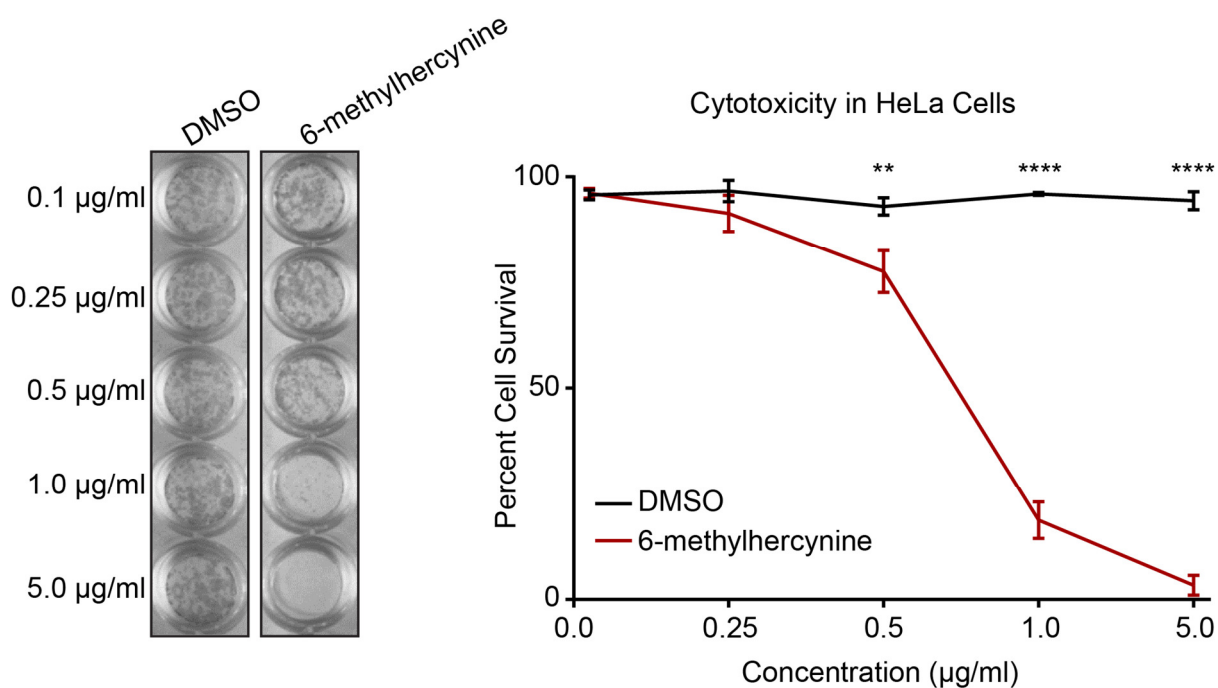

Figure S17: HeLa cells were treated with 6-methylhercynine (red) or DMSO (black) at the indicated concentrations for 10 days. Cell survival was measured by crystal violet staining. Error bars represent 95% confidence interval from 3 biological replicate:
